# Supplementary material for: Heat Stress and Lipopolysaccharide Stimulation of Chicken Macrophage-Like Cell Line Activates Expression of Distinct Sets of Genes
Source: PubMed Central journal article supplement (PMC5063343; doi:10.1371/journal.pone.0164575), 2016-10-13
Supplement: pone.0164575.s003.pdf [file pone.0164575.s003.pdf]

## S1 File

### Two-step optimization of heat stress conditions for HD11 cell line.

1. Selection of temperature: 45°C vs. 47°C (41.5°C was considered thermoneutral). Pilot study has been designed to determine the conditions of heating that would be considered a stress to the cells but without detrimental effects on their viability. Trypan blue exclusion assay was used to assess viability:

**Table 1.** Viability of HD11 cells after incubation in different thermal conditions

| Temperature/Time | 1 hour | 3 hours |
|------------------|--------|---------|
| 41.5°C           | 86 %   | 84 %    |
| 45°C             | 83 %   | 85 %    |
| 47°C             | 69 %   | 37 %    |

**Results:** Temperature of 45°C did not reduce viability of the cells when compared to cells kept in thermoneutral conditions. The temperature of 47°C was considered detrimental and as such, removed from the study.

2. Selection of heat stress duration (1hr vs. 3 hrs.) at 45°C (41.5°C was considered thermoneutral control). Gene expression regulation of HSP70 (by RT-qPCR) was indicative of molecular responses to heat stress

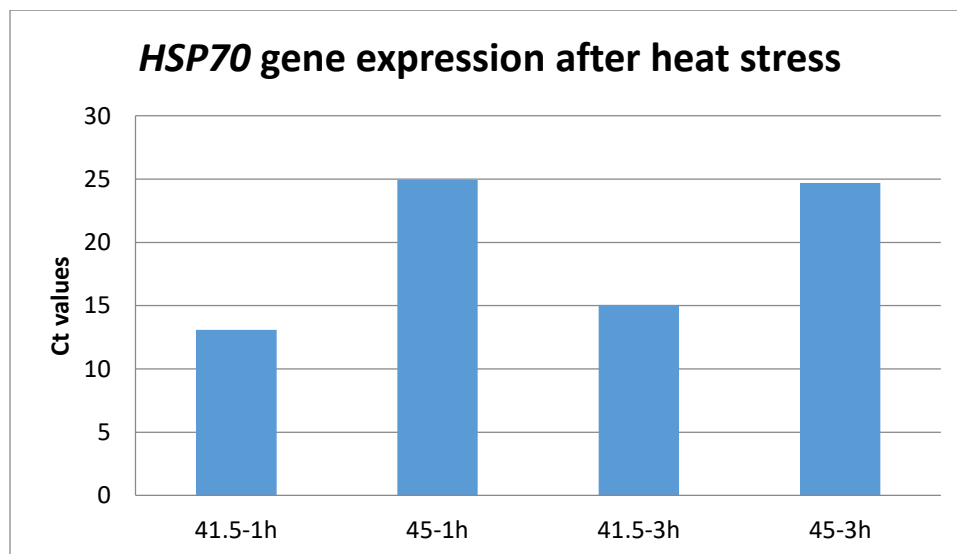

**Results:** There were no differences between HD11 cells incubated for 1hr vs. 3hrs. at elevated ambient temperature (45°C). For further experiments, intermediate duration of heat stress (i.e. 2hrs) was selected.
