# Supplementary material for: Heat Stress and Lipopolysaccharide Stimulation of Chicken Macrophage-Like Cell Line Activates Expression of Distinct Sets of Genes
Source: PubMed Central journal article supplement (PMC5063343; doi:10.1371/journal.pone.0164575), 2016-10-13
Supplement: pone.0164575.s006.pdf [file pone.0164575.s006.pdf]

**S1 Table. DELTAgene™ Assays used in gene expression study**

| Gene     | Entrez ID | Forward primer          | Reverse primer          |
|----------|-----------|-------------------------|-------------------------|
| BAG3     | 423931    | ACCACAACAGCCGAACCA      | GATGGGCCATTTGCTGATGAC   |
| CASP1    | 395764    | GTGGAGTGCCATGAAGACAAA   | AGGTGCTGTCAGAGGTCAAA    |
| CASP3    | 395476    | CGCTCAGGGGAAGATGTATCA   | CCAGAGTCCACAGACTTGCTA   |
| CASP7    | 423901    | ATGACCGAAGCTGTGAGGATA   | GGCAAAACAAGCAGCATCAC    |
| CASP8    | 395284    | GCTTGTAACAGAGGGGCAAA    | CACAGATGATGCCAGCCAAA    |
| CASP9    | 426970    | TTTCAGGTCCCTGTGCTTCC    | TTCCGCAGCTCCACATCAA     |
| CCL4     | 395468    | CCTCATCCAGAGGCACTACA    | GCTTGACGCTCTGCAGGTA     |
| CCL5     | 417465    | CTGCCCCAGAATCATGTGAA    | CAGCTCCAGGAAGTTGATGTA   |
| CD40     | 395385    | AGCCTGGTGTGCTGTGAA      | CTCACAGGGTGTGCAGACA     |
| CIRBP    | 425789    | TCGGCTTTGTGACGTTTGAA    | CTCTGATCTGACGGCCATCTA   |
| DNAJA4   | 415360    | AAGTACCACCCCGACAAGAA    | TTGGGTCCGACAGAACTTCA    |
| DNAJB6   | 420448    | GTGGATTCCCTGCTTTTGAA    | CTCCATGTCCCAGAGAACCA    |
| H6PD     | 428188    | ATGTACCGGGTGGACCACTA    | AACTGACGTTTCTGATCTCGAAA |
| HSF2     | 421724    | AGGACTTCCAGGCCATGTTA    | CATCTGCACGGAGCTTGTA     |
| HSF4     | 427540    | TTCTGTTTGGCCAGCTCCAA    | ACAACCCACTGTCAAGCATCA   |
| HSF5     | 417471    | AGTCCTACAGCTCTGACCTACA  | GCAGGAACTCAACCGCATAC    |
| HSP25    | 428310    | GCACGCAGAGACCATCTTCA    | TGCTCGAAGCTGCTCATGAA    |
| HSP90AAI | 423463    | ACACATGCCAACC GCATTTA   | CCTCCTCAGCAGCAGTATCA    |
| HSPA14   | 418802    | TTGGCGGAGTGTACTTCACA    | CCTGGGATTTCTCTGATGTCA   |
| HSPA2    | 423504    | CCACCATTCCCACCAAACAA    | ATACACCTGGACGAGGACAC    |
| HSPB8    | 416988    | GAGCTGACGGTCAAACCAA     | GAGACGATGCCTCCTTCCA     |
| HSPH1    | 418917    | GTAGTTTCGTTCCGGCTCCAA   | CTGTGTTGTGGGCATGAGTAA   |
| IFNA     | 396398    | CCACACCTTCTCCAAGACAA    | TTGTGGATGTGCAGGAACCA    |
| IFNB     | 554219    | GCTCACCTCAGCATCAACAA    | TCCCAGGTACAAGCACTGTA    |
| IL12B    | 404671    | CTTCTGGAAGCACAGTGGAAAC  | AGCTGGTGTCTCATCGTTCC    |
| IL18     | 395312    | CGTGGCAGCTTTTGAAGATGTA  | CTGAATGCAACAGGCATCCC    |
| IL1B     | 395196    | TGCTTCGTGCTGGAGTCAC     | GGCATCTGCCCAGTTCCA      |
| IL8      | 396495    | CCCCACTGCAAGAATGTTGAAA  | GTGCCTTTACGATCAGCTGTAC  |
| iNOS     | 395807    | GGACCGAGCTGTTGTAGAGATA  | AGCAGCTGAGTGATGATCCA    |
| IRAK4    | 417796    | CAATGGTTCGCTGCTTGACA    | CGCAGTACCTTGAGCAATTTCA  |
| JUN      | 424673    | TCCCCTGTCCCCTATTGACA    | CGCCGCAATTCTGTTTCTCA    |
| LITAF    | 374125    | ATCGTGACACGTCTCTGCTA    | AGCATCAACGCAAAAGGGAA    |
| MAPK8IP3 | 426986    | GCCAAAGCCAAAATGGAAACC   | GTCGAGCAACAATCGCTTCA    |
| MAPK9    | 395983    | TTACAGAGCGCCAGAGGTTA    | TCTCCCATGATGCAACCAAC    |
| MyD88    | 420420    | GAACGTGTGTGTGGTCCATTA   | TGAAATGACGACCACCATCC    |
| NLRC5    | 100857413 | TTTGCTGCTGCGCTTTCA      | TGTGATGCTTCCACCTGTCA    |
| RB1CC1   | 421116    | CAAGCAGGAGCTTGCGAATA    | CATCTTGGTCAGCATGAAGCA   |
| RPL4     | 415551    | TTCTGCCTTGGCAGCATCA     | AGGAAGTTCTGGGATCTCCTCA  |
| SERPINH1 | 396228    | AACTGATGGAGCCCTTATTGTCA | TCACCATGAAGCCACGGTTA    |
| SMAD6    | 374096    | GTGTGCTGCAATCCGTACC     | TTAGGAGACAGCCGGGAGTA    |
| TGFB2    | 421352    | CGTGCTCTAGATGCTGCCTA    | GCCAAGATCCCTCTTGAAGTCA  |
| TGFB3    | 396438    | GGGCCCTGGATAACCACTAC    | GGTCCTGTGGAAGTCAATGTA   |
| TLR4     | 417241    | CCTGCTGGCAGGATGCA       | TGTTCTGTCTGTGCATCTGAA   |
| TP53     | 396200    | GCTGAACCCCGACAATGAGATA  | GCGCCTCATTGATCTCCTTCA   |
| TRAF6    | 423163    | TGCCCCAGTACCATGCTTTTA   | GTGTCGTGCCAGTTCATTCC    |
| UBB      | 396190    | GGGGCGTCGGAGGATATATAA   | CACAACAGACCAAACCCGTTA   |
